# Challenges and Strategies for Recruiting Type 1 Diabetes Families in Kuwait with Strong Beliefs in Familism

## Running title: Roadmap for recruitment of culturally based families

Zahra Rahme<sup>1</sup>, Nehad Taha<sup>1</sup>, Hidaia Abdalla<sup>2</sup>, Smitha Abraham<sup>2</sup>, Asma Alhubail<sup>3</sup>, Hala AlSanee<sup>4,5</sup>, Maria AlMahdi<sup>4,6</sup>, Fahed Aljaser<sup>4,5</sup>, Majda Abdelrasoul<sup>7</sup>, Mona Al Khawari<sup>4,5</sup>, Mohamed Jahromi<sup>2</sup>

1 Education & Training Unit, Medical Division, Dasman Diabetes Institute, Kuwait

2 Clinical Research Unit, Medical Division, Dasman Diabetes Institute, Kuwait

3 Head of Clinical Laboratory, Medical Division, Dasman Diabetes Institute, Kuwait

4 Pediatric Endocrinology Clinic, Medical Division, Dasman Diabetes Institute, Kuwait

5 Pediatric Endocrinology Clinic, Amiri Hospital, Ministry of Health, Kuwait

6 Pediatric Endocrinology Clinic, Adan Hospital, Ministry of Health, Kuwait.

7 Endocrinology Department, Medical School, University of Kuwait, Kuwait

### Correspondence:

M Jahromi

Senior Scientist, Clinical Research Unit, Medical Division

Dasman Diabetes Institute

P.O. Box 1180, Dasman 15462, Kuwait

Email: [mohamed.jahromi@dasmaninstitute.org](mailto:mohamed.jahromi@dasmaninstitute.org)

### Acknowledgement

The authors would like to acknowledge the help of Ms Faten Sukkar for her initial support and conduction of the meetings. The authors would like to thank Mr. Sriraman Devarajan and his team for their cooperation and help in processing the samples and Mrs. Lorelee Tabada for her extended efforts in taking blood samples from KADS families' members. The authors would like to thank Enago ([www.enago.com](http://www.enago.com)) for the English language review.

## **Abstract**

Type 1 diabetes (T1D) is one of the most common endocrine and metabolic conditions in children. In fact, this disease in children and adolescents has been increasing exponentially, with Kuwait being ranked second highest in the world regarding the number of T1D incidences.

Kuwait is an oil-rich country known for its strong sense of familism, affiliative obedience, and filial obligation. Therefore, a familial study of this disease may disclose certain causative agents responsible for passing the disease on to subsequent generations.

To recruit T1D patients and their family members, three different scenarios were developed. First, since Kuwaiti families are generally obedient to their doctors, the authors decided to recruit the patients through their endocrine physicians. Second, home visits were performed for meeting the families' requirements. In this case, a team consisting of one nurse, two phlebotomists (a male and a female, since some refused to be seen by the opposite gender), and a driver of the institute's car was arranged. Finally, two diabetes educators were employed to resolve any issues raised during the recruitment process. Utilizing these approaches helped convince the culturally and religiously oriented Kuwaiti families to participate in this study. In this case, the doctors and educators were not only aware of the obstacles in this population but also sensitive to the families' beliefs. This paper reports on our experience in recruitment and presents a roadmap for any future familial studies on culturally tailored societies i.e. Arab populations.

**Keywords:** Kuwaiti autoimmune diabetes (KADS), Familial aggregation, Type 1 diabetes (T1D), Arab population, cultural beliefs, recruitment.

## 1 **1. Introduction**

2 Diabetes has reached epidemic proportions throughout the world, thus affecting millions of  
3 people. In fact, for every adult diagnosed with diabetes, there is another who is undiagnosed,  
4 since chronically elevated blood glucose levels do not often result in symptoms [1]. In Kuwait,  
5 there has been a rapid increase in childhood-onset of T1D incidences over the last several  
6 decades, with the current number reported as 41/100,000/year, which is the second highest in the  
7 world after Finland [2] (see Figure 1). Given the prevalence of this disease, special actions for  
8 preventing and reducing its impact in Kuwait should be one of the highest priorities for scientific  
9 research and healthcare.

10 T1D is defined as immune-mediated diabetes [3], which is caused by genes and environmental  
11 factors, such as viruses, that trigger the disease [4]. It is usually found in children, adolescents,  
12 and young adults, especially those with hyperglycemia and diabetic ketoacidosis [4]. The  
13 tendency to develop T1D, as shown in other autoimmune diseases, can be passed down through  
14 subsequent generations. Numerous studies, such as TrialNet, BABYDIAB in Germany, All  
15 Babies in Southeast Sweden [ABIS], Bart's Oxford Family Study [BOX] in the U.K., and the  
16 Diabetes Autoimmunity Study in the Young [DAISY] in U.S.A., have focused on the causes of  
17 T1D and the possible ways to prevent or mitigate the disease.

18 Although a significant proportion of patients with T1D lack a family history of the disease, there  
19 is considerable familial clustering, with an average prevalence of 6% among siblings, compared  
20 to the 0.4% of the U.S. population. Moreover, there is a 3.8% risk of T1D among the Japanese  
21 siblings of patients with T1D, compared to the 0.01~0.02% prevalence in the Japanese  
22 population [5, 6]. In this regard, the sibling ratio ( $\lambda_s$ ) can be calculated as the ratio of the risk to

23 siblings over the disease prevalence in the general population or  $\lambda_s = 6/0.4 = 15$  and  
24  $3.8/0.01 \sim 0.02 \Rightarrow 100$  for the U.S. and Japan, respectively [5, 6].

25 Familial aggregation refers to the occurrence of a given trait shared by family members (or a  
26 community) that cannot be readily accounted for by chance. In this case, a family with a sibling  
27 or parent with T1D is much more likely to pass the disease on to other family members [5, 7].

28 The rising incidences of this disease in Kuwait might be due to rapid lifestyle changes, including  
29 “a sedentary lifestyle, changes in breastfeeding practices, and autoimmune deficiency caused by  
30 greater hygienic standards and low vitamin D levels, which are highly prevalent in the region in  
31 spite of the sunshine” [8]. Meanwhile, the rate of consanguinity and endogamous marriages in

32 Kuwait is quite high at 22.5%–64.3% [9, 10]. Previous research has shown that localizing the  
33 root cause of complex diseases has been successful among such populations [11]. Kuwait

34 Autoimmune Diabetes Study (KADS) is a familial case/control study. It aims to elucidate the  
35 islet autoantibodies profiling of Kuwaiti children and adolescents with T1D with T1D and their  
36 first-degree relatives. Recruiting families, including children, for clinical research studies can be  
37 challenging, and re-recruiting former participants can be even more difficult. Since Kuwait is  
38 known for its strong sense of familism, affiliative obedience, and filial obligation, a familial  
39 study of this disease may disclose certain causative agents responsible for passing the disease on  
40 to subsequent generations.

41 To the best of our knowledge, this is the first well-structured longitudinal familial study aimed at  
42 characterizing this serious disease. For this study, it provides general background information  
43 about the Kuwaiti national population, with its strong sense of familism, peculiar form of  
44 economic development, and history of pro-nationalist pressures associated with Arabic and

45 Islam. Although the authors have extensive experience in familial recruitment in the U.K., the  
46 U.S., and Bahrain, there were certain difficulties in convincing, recruiting, and re-recruiting  
47 Kuwaiti families.

48 Several barriers to recruitment of participants were identified in literature. The attitudes of  
49 patients towards participation in research are considered as the main psychosocial barriers  
50 encountered in healthcare research [12, 13]. Distrust of outsiders, researchers, is one of the main  
51 psychosocial barriers encountered in recruitment for research [12, 14] . The inclusion of those  
52 who are insiders in the candidates' community such as healthcare providers or community-based  
53 healthcare organizations may help in overcoming the mistrust barrier to study recruitment [12,  
54 15]. Previous researchers recruited via clinicians or nurses as they are more capable of gaining  
55 the patients' trust [16], however, Sullivan-Bolyai et al deduced that physicians see recruitment  
56 for research as either job that consumes their time with no compensation or takes away time from  
57 patient care. Some researchers overcame this barrier by providing monetary incentives or  
58 offering other incentives such as purchasing a laptop, textbooks, journal or professional  
59 organization subscriptions, or sponsoring professional health care conference attendance [16] .  
60 Yet, these are costly and represent a burden on the budget of any study [17]. Families often  
61 recognize nurses as 'trustworthy', since the biggest trust barrier is lack of knowledge about the  
62 researchers, the healthcare research, and lack of trust in scientists [12]. Relationships represented  
63 an important human factor of recruitment; regular contact with patients and their families  
64 between visits may contribute to patients' willingness to participate in research studies and  
65 positively affect the retention of participants [16]. Morgan et al highlighted that the presence of  
66 incurable illness reduced patients' and families' inclination to participate in research studies  
67 versus others with curable diseases who were more willing to participate [12, 18]. While Schutta

68 et al deduced that the main drive for participation in research studies is the hope for a cure from  
69 the disease [19]. Therefore, the main goal is to contextualize the strategies and difficulties and to  
70 share our experiences with those interested in culturally oriented populations (e.g., Arabs).

## 71 **2. Methodology**

72 This study was approved by the Scientific Board of the Dasman Diabetes Institute (DDI). From  
73 November 2016 to September 2018, the authors conducted and modified several waves of  
74 research to recruit a sample of T1D patients, along with their first-degree relatives. In this case,  
75 the subjects were families with either an affected member or sibling or offspring (see Figure 2),  
76 with the goal of determining the T1D causing agent(s).

### 77 **2.1 Physician-based approach**

78 Since Kuwaiti families are generally obedient to their doctors, the authors decided to recruit the  
79 patients through their endocrine physicians. Relying on the physicians was helpful since they  
80 clearly explained the purpose of the study to the patients and their families. Health information  
81 management (HIM) personnel and the research coordinator (RC) were also part of the research  
82 team to facilitate the recruitment process.

### 83 **2.2 Home visits**

84 Making home visits was another approach for meeting the families' requirements. In this case, a  
85 team consisting of one nurse, two phlebotomists (a male and a female, since some participants  
86 refused to be seen by the opposite gender), and a driver of the institute's car was arranged. After  
87 receiving their consent, the list of families was categorized by the RC according to the  
88 districts/areas in which they lived. In order to prevent any duplication or multiple coding, the

89 Dasman Diabetes Institute's Biobank was responsible for label preparation and family coding .  
90 Two laboratory technicians were also available to process the samples as soon as they arrived.

### 91 **2.3 Diabetes educator**

92 Evidence-based medicine recommends educating patients about their respective diseases. In this  
93 regard, diabetes education has been shown to be effective in assisting patients to make informed  
94 decisions regarding the management of their disease [18]. In addition, such education can help  
95 reduce disease-related tension and improve an individual's quality of life.

96 In this study, the patients were referred to a diabetes educator (DE), who taught them about the  
97 disease, how to improve their diabetes control, and how to manage their diabetes on a daily  
98 basis. The final and current mode of family enrollment was tailored according to the DE. The  
99 authors utilized this close relationship between the patients, parents, and DE to explain the  
100 importance of KADS, clarify the purpose of the study, and present the expected outcomes.  
101 Overall, the RC was in direct contact with the DE. Moreover, the RC was responsible for  
102 recording the data and the follow-up visits with the patients and their family members.  
103 Meanwhile, tubes and labels were necessary for categorizing the samples. Finally, the  
104 participants were requested to fast for approximately eight hours before their samples were  
105 collected.

### 106 **3. Results**

107 From November 2016 to September 2018, three main scenarios were performed. Each scenario  
108 was modified in order meet the needs of the family recruitment process. Overall, a reasonable  
109 number of families agreed to participate in the study. However, some individuals either did not  
110 respond to the RC or rejected or postponed their participation. Another drawback was that,

111 according to Kuwaiti parental law, consent for minors under the age of 21 must be signed by the  
112 father and not the mother. Given the fact that the fathers rarely attend the routine visits to the  
113 physicians, it was hard to get the consent later via our RCs.

114

### 115 **3.1 Physician-based approach**

116 During physician-based approach, we collected 22 consented families to participate; however,  
117 none of them appeared. Despite our RC repeatedly contacting them, they still did not show any  
118 interest, Table 1. Moreover, when the physician retired, the team were faced by clear rejection of  
119 participation from the families.

120

### 121 **3.2 Home visits**

122 Home visit approach was mainly proposed to tackle resistance to visit the institute for sample  
123 collection, and to avoid transportation of any disabled family members. It was likely that this  
124 flexible approach would increase participation rates, as logistical barriers such as inflexible work  
125 schedules or lack of transportation of disabled family member. Although a skilled and  
126 multidisciplinary team was arranged, this approach was not applied, due to the following reason  
127 (see Table 2).

128

### 129 **3.3 Diabetes educator**

130 At the DDI, all the patients were referred to the DE, who educated them and their respective  
131 families about diabetes management. In total, 31 (3.86% per month) Kuwaiti families with at  
132 least one affected member were successfully recruited (see Table 3).



133

## 134 **4. Discussion**

135 In this article, we draw upon our own experience conducting a familial aggregation study. We  
136 explain the challenges we faced through our recruitment journey and how the research team  
137 overcame the challenges faced with initial recruitment strategies. Additionally, we report on our  
138 successful recruitment strategy which can be adopted by researchers in similar culture.  
139 From our experience, we faced some barriers which could be categorized into: psychosocial  
140 barriers and physical barriers.

### 141 **4.1 Psychosocial barriers**

142 The anti-research attitudes of patients towards participation in research are considered were the  
143 main psychological barriers. In our study, the DEs were challenged by tribal and religious beliefs  
144 of the candidate families. Participation in research was believed by some to be opposition of  
145 God's fate and that all research was purposeless because they believed God is the only healer.  
146 Other families had negative attitude from some families during recruitment, as they believed no  
147 direct benefit to the affected case or their family, although the DEs often highlighted that the  
148 evidence and information gained from this research may help scientists and doctors to learn more  
149 about this condition and ultimately pave the road to find a cure or prevent that condition. On the  
150 other hand, some families had some unrealistic expectations of their participation, such as  
151 finding a cure for T1D. Our DEs frequently enforced the purposes and expected outcomes of the  
152 study, as it is crucial in gaining the participants' trust and improving retention rate.  
153 Mistrust in the research system and negative experience from former participation in research  
154 was another psychosocial barrier. Some candidates claimed they were never informed with the

155 results of the study in which they participated. Due to the strong familial structure of the Kuwaiti  
156 families, some candidates were afraid of leakage of data and being stigmatized as families with  
157 hereditary disease (T1D in our study) and others were in denial or fear of knowing that other  
158 controls from the family maybe susceptible or diagnosed with T1D in the future. Luckily, those  
159 candidates are provided with education by DEs within the same clinics where they were  
160 recruited. Continuous education was successful in most of the cases to change the candidates  
161 minds towards participation in the study. In addition, the candidates were assured about the  
162 confidentiality of the data and that no reference to their identities, families or tribes in any  
163 published article about this study. Mistrust of the healthcare research system and reliance on  
164 their traditional beliefs and religion and worship for healing were the main psychological barrier  
165 we experienced throughout our work. Relatively the same barriers have been raised by others as  
166 well [13]. These barriers were reduced by providing continuous education during our study  
167 period as found by previous studies [13].

168 The strong relationships and continuous support families received from DEs encouraged them to  
169 participate in our study, which was deduced by others as well [16].

170

#### 171 **4.2 Physical barriers**

172 Physical barriers to recruitment in our study included: time constraints, health related barriers  
173 (such as having a disabled family members), distance, language barrier or linguistic slang and  
174 financial barriers. All of which were reflected on the intensity recruitment efforts, recruitment  
175 rate and retention rate.

176 Distance was not an issue for most of the participants in our study, as the study recruitment site  
177 was located at the diabetes healthcare institute, where the cases were treated/followed up. That  
178 increased the participation convenience for the subjects and reduced some of the physical  
179 barriers. However, transportation for disabled family member was an issue for some families.  
180 Thus, the study team proposed the home visit approach for sample collection to reduce the  
181 burden on the family. With enough staff and funds this could be a successful approach to tackle  
182 this barrier. However, this approach faced several logistic barriers in our study, and was not  
183 preceded, resulting in losing some candidates who had disabled family member. The team had to  
184 set-up a database to track the contact with the consented families and to convince them to  
185 participate and to schedule appointments for samples' collection and to confirm these  
186 appointments, while working around the families' schedule and the available staff's schedule.  
187 Those challenges included; the shortage of staff of lab technicians and drivers, sensitivity of  
188 storing the samples in the weather conditions of Kuwait during the time from collecting to  
189 processing of the samples and working around the families' schedule to arrange for the  
190 appointments. Language barrier was a main barrier, given the fact that all lab technician are non-  
191 Arabic speakers, as the subjects, especially children, would need assurance while taking the  
192 blood samples.

193 Time was the main physical barrier for recruiters and participants of our study. The treating  
194 physician's limited time was a barrier against clear explanation of the study purposes and  
195 requirements. The alternative was utilizing the close relationship DEs had with families. DEs  
196 were Arabic speakers who follow-up closely with diabetic patients and their families through  
197 education clinic visits and telecare. Through these close relationships, DE had more time than  
198 physicians and can explain the purpose and requirements of the study in their language. Initially,

199 the DEs would get the families' consent and then forward the contact to the RC, who would  
200 finalize the logistics with the phlebotomy, the laboratory and the Biobank for samples'  
201 collection, processing and storage, then would set up the appointments for sample collection. The  
202 problem which often faced the research team is that the families would postpone the appointment  
203 for sample collection due to work or school commitments, and ultimately declining participation.  
204 The research team brainstormed alternative ways to facilitate sample collection on the same day  
205 of signing the consent form. Finally, the team created a fast-track to finalize the logistics within  
206 the same time of the family's visit to the DE clinic and take the consent and the samples on the  
207 same day to avoid any confliction with the family commitment and scheduling. Moreover, the  
208 future sample collection visits were rescheduled on same days with the follow-up visits with the  
209 DEs to relieve the burden on the family and the interruption of their work/school commitments.  
210 We accommodated most appointment time requests, excluding cases, who had to be fasting at  
211 least 8 hours prior to sample collection. This helped to address the scheduling barriers where  
212 some participants were difficult to obtain samples from due to time constraints.

213

## 214 **5. Conclusion**

215 T1D is a common, multifactorial disease with strong familial clustering. In Kuwait, the incidence  
216 of T1D among children aged 14 years or under is the second highest in the world, with the  
217 number of cases increasing approximately 2.4% per year. Annually, a significant part of the  
218 Kuwaiti healthcare budget is specified for the management of lifelong chronic diseases. Since  
219 T1D usually starts in early childhood, the affected member will be under severe stress, which  
220 negatively impacts his/her quality of life. Although most new T1D cases are sporadic, first-  
221 degree relatives have an increased risk of developing the same disease. Evidentially, the high rate

222 of consanguinity and intermarital situations might have contributed to the epidemic growth rate  
223 of this disease. Therefore, examining KADS should be one of the highest priorities in diabetes-  
224 related research and healthcare.

225 Although the authors have thorough experience in recruiting T1D families, the present study is  
226 the result of 23 months of research regarding Kuwaiti T1D families with at least one affected  
227 member. It is important to note that, in Kuwait, convincing families with an affected member  
228 was an extremely difficult task, due to their strong sense of familism, linguistic slang, culture,  
229 and religious traditions. Throughout the above period, we observed that Kuwaiti families (or,  
230 possibly, families in general) tend to feel more relaxed if the person is accustomed to their  
231 culture and is comfortable using linguistic slangs. This might have been the reason behind our  
232 lack of success in our physician-based approach, as our physicians were Kuwaitis but were  
233 approached by a non-native RC. Similarly, the DE was used to the Kuwaiti culture and slangs  
234 because she was born in Kuwait. Of course, this attitude cannot be considered racist, rather it is  
235 the cultural approach and psychology of people. All the study participants had conflicting  
236 commitments, including work, schools, familial activities. Our study team had to work around  
237 the schedules of all family members, giving appointments for sample collection. To overcome  
238 that barrier, the study team managed to simplify the logistic barriers, including phlebotomy,  
239 laboratory and biobank logistics for sample collection, processing and storage. This way, the  
240 participants would be able to provide the samples on the same time they had consented during  
241 their visit to the DEs clinics. This flexible approach in means of participation relieved the RCs  
242 and encouraged participation of the families at relatively low costs. Scheduling families and  
243 confirmation of sample collection appointments using DEs telecare phone/WhatsApp, facilitated  
244 the continued study participation; and helped to overcome the barrier of timing.

245

## 246 **Lessons from the recruitment process**

247 Throughout this 23-month journey, the authors came across certain obstacles when recruiting the  
248 culturally focused families. Committed research staff may be able to brainstorm alternative  
249 approaches to recruitment and logistic steps of sample collection. Thus, the current DE-oriented  
250 approach is a suitable scenario for recruiting families with strong familism beliefs. However, we  
251 could have prevented the loss of certain families if we had planned for family visits on, for  
252 example, open weekends and after hours. Moreover, it would have been more rewarding if we  
253 had provided the families with simple incentives such as nutritious meals. Linguistic slang is a  
254 critical factor in familial recruitment in Kuwaiti families.

255

## 256 **Limitations**

257 The purpose of the present study was to characterize Kuwaiti Arab families. However, it  
258 disregarded Kuwaiti families with non-Arab mothers. This was simply due to genetic  
259 segregation, and it had nothing to do with racism. It narrowed our options in the recruitment  
260 process. Finally, it is important to note that there were several families that simply mistrusted  
261 diabetes research in general and refused to take part in this study or in any healthcare-related  
262 research.

263

264

265

266

267 **Authors' contributions**

268 MJ, as the principal investigator of KADS, designed and wrote the manuscript. NT revised the  
269 manuscript and contributed in the family recruitment process. ZR contributed extensively in the  
270 family recruitment process, while HA collected the data and coordinated with the families. MA,  
271 MM, FA, and HA served as the treating physicians.

272 **Declaration**

273 The authors have no affiliations with or involvement in any organization or entity with any  
274 financial interest

275 **Ethical Approval**

276 The current research was conducted after obtaining written approval from Dasman Diabetes  
277 Institute Ethical Review committee, RA 2016-015, and informed consent was attained by each  
278 participant in written.

## 279 **References**

- 280 1. Federation. ID. Diabetes Atlas 8th edition. 2017.
- 281 2. Shaltout AA, Wake D, Thanaraj TA, Omar DM, Al-AbdulRazzaq D, Channanath A, et al. Incidence  
282 of type 1 diabetes has doubled in Kuwaiti children 0-14 years over the last 20 years. *Pediatric diabetes*.  
283 2017;18(8):761-6. doi: 10.1111/pedi.12480. PubMed PMID: 27981709.
- 284 3. Jahromi MM. Haplotype specific alteration of diabetes MHC risk by olfactory receptor gene  
285 polymorphism. *Autoimmunity reviews*. 2012;12(2):270-4. doi: 10.1016/j.autrev.2012.05.001. PubMed  
286 PMID: 22579560.
- 287 4. Jahromi MM, Eisenbarth GS. Cellular and molecular pathogenesis of type 1A diabetes. *Cellular  
288 and molecular life sciences : CMLS*. 2007;64(7-8):865-72. doi: 10.1007/s00018-007-6469-4. PubMed  
289 PMID: 17429581.
- 290 5. Jahromi MM, Eisenbarth GS. Genetic determinants of type 1 diabetes across populations. *Annals  
291 of the New York Academy of Sciences*. 2006;1079:289-99. doi: 10.1196/annals.1375.044. PubMed PMID:  
292 17130568.
- 293 6. Ikegami H, Kawaguchi Y, Yamato E, Kuwata S, Tokunaga K, Noma Y, et al. Analysis by the  
294 polymerase chain reaction of histocompatibility leucocyte antigen-DR9-linked susceptibility to insulin-  
295 dependent diabetes mellitus. *The Journal of clinical endocrinology and metabolism*. 1992;75(5):1381-5.  
296 doi: 10.1210/jcem.75.5.1358911. PubMed PMID: 1358911.
- 297 7. Eaton WW, Rose NR, Kalaydjian A, Pedersen MG, Mortensen PB. Epidemiology of autoimmune  
298 diseases in Denmark. *Journal of autoimmunity*. 2007;29(1):1-9. doi: 10.1016/j.jaut.2007.05.002. PubMed  
299 PMID: 17582741; PubMed Central PMCID: PMCPMC2717015.
- 300 8. Gellert S, Strohle A, Hahn A. Breastfeeding women are at higher risk of vitamin D deficiency than  
301 non-breastfeeding women - insights from the German VitaMinFemin study. *Int Breastfeed J*. 2016;12:19.  
302 doi: 10.1186/s13006-017-0105-1. PubMed PMID: 28435438; PubMed Central PMCID: PMCPMC5397784.
- 303 9. Yang X, Al-Bustan S, Feng Q, Guo W, Ma Z, Marafie M, et al. The influence of admixture and  
304 consanguinity on population genetic diversity in Middle East. *Journal of human genetics*.  
305 2014;59(11):615-22. doi: 10.1038/jhg.2014.81. PubMed PMID: 25253659.
- 306 10. Al-Herz W, Naguib KK, Notarangelo LD, Geha RS, Alwadaani A. Parental consanguinity and the  
307 risk of primary immunodeficiency disorders: report from the Kuwait National Primary Immunodeficiency  
308 Disorders Registry. *Int Arch Allergy Immunol*. 2011;154(1):76-80. doi: 10.1159/000319212. PubMed  
309 PMID: 20664281.
- 310 11. Kristiansson K, Naukkarinen J, Peltonen L. Isolated populations and complex disease gene  
311 identification. *Genome Biol*. 2008;9(8):109. doi: 10.1186/gb-2008-9-8-109. PubMed PMID: 18771588;  
312 PubMed Central PMCID: PMCPMC2575505.
- 313 12. Pribulick M, Williams IC, Fahs PS. Strategies to reduce barriers to recruitment and participation.  
314 *Online journal of rural nursing and health care: the official journal of the Rural Nurse Organization*.  
315 2010;10(1):22.
- 316 13. Linden HM, Reisch LM, Hart Jr A, Harrington MMA, Nakano MC, Jackson JC, et al. Attitudes  
317 toward participation in breast cancer randomized clinical trials in the African American community: a  
318 focus group study. *Cancer nursing*. 2007;30(4):261.
- 319 14. Jones JM, Nyhof-Young J, Moric J, Friedman A, Wells W, Catton P. Identifying motivations and  
320 barriers to patient participation in clinical trials. *Journal of Cancer Education*. 2007;21(4):237-42.
- 321 15. Dibartolo M, McCrone S. Recruitment of rural community-dwelling older adults: barriers,  
322 challenges, and strategies. *Aging & Mental Health*. 2003;7(2):75-82.



- 323 16. Bower P, Brueton V, Gamble C, Treweek S, Smith CT, Young B, et al. Interventions to improve  
324 recruitment and retention in clinical trials: a survey and workshop to assess current practice and future  
325 priorities. *Trials*. 2014;15(1):399.
- 326 17. Sullivan-Bolyai S, Bova C, Deatrick JA, Knafk K, Grey M, Leung K, et al. Barriers and strategies for  
327 recruiting study participants in clinical settings. *Western Journal of Nursing Research*. 2007;29(4):486-  
328 500.
- 329 18. Morgan LL, Fahs PS, Klesh J. Barriers to research participation identified by rural people. *Journal*  
330 *of agricultural safety and health*. 2005;11(4):407-14.
- 331 19. Schutta KM, Burnett CB, editors. Factors that influence a patient's decision to participate in a  
332 phase I cancer clinical trial. *Oncology Nursing Forum*; 2000.

333

**Figure 1: Top ten countries with highest rate of type 1 diabetes around the world**

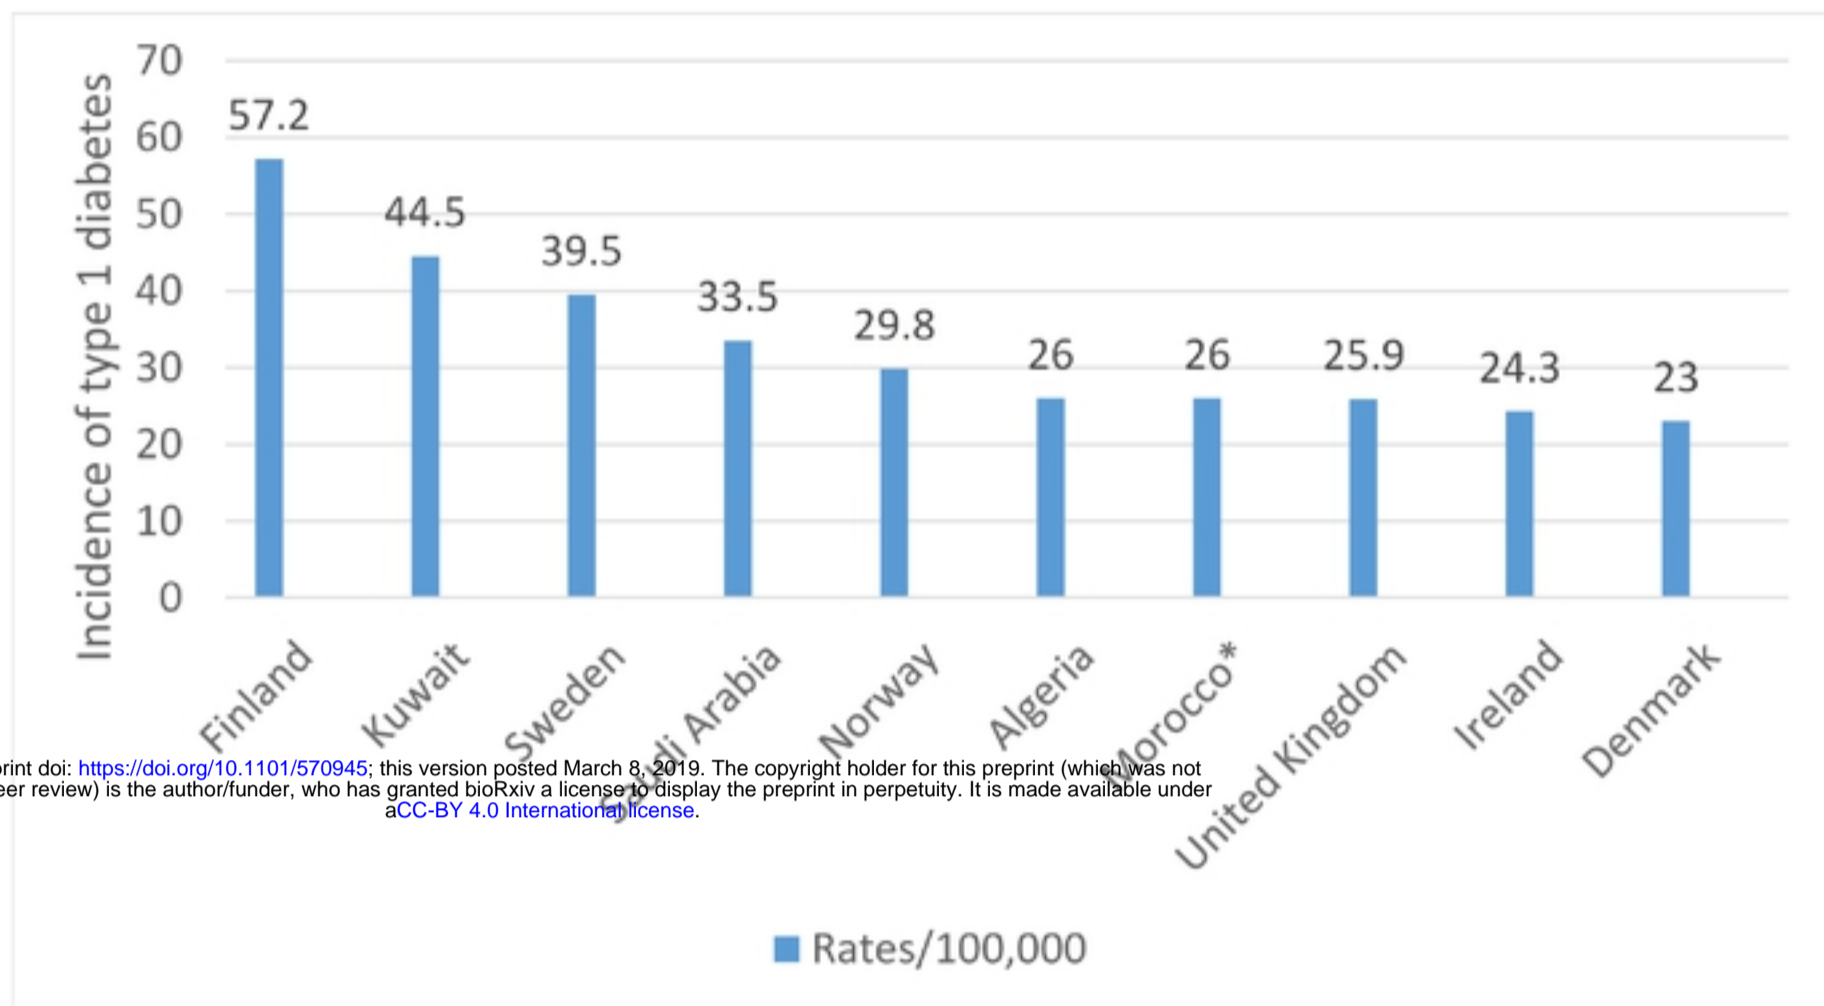

bioRxiv preprint doi: <https://doi.org/10.1101/570945>; this version posted March 8, 2019. The copyright holder for this preprint (which was not certified by peer review) is the author/funder, who has granted bioRxiv a license to display the preprint in perpetuity. It is made available under aCC-BY 4.0 International license.

Global ranking of top ten countries around the world. Kuwait is the second after Finland.

**Table 1.**

| <b>Reasons for lack of success of physician-based recruitment approach</b> |
|----------------------------------------------------------------------------|
| Linguistic slang                                                           |
| Lack of trust in healthcare research                                       |
| Insufficient time of physicians to explain study purposes and requirements |

**Table 2.**

| <b>The obstacles faced the home-visits approach</b>                                     |
|-----------------------------------------------------------------------------------------|
| Both male and female phlebotomists were required                                        |
| The availability of all family members                                                  |
| The fasting of more than 8 hours, given that the majority were children                 |
| The lack of private transportation for the follow-up visits by some of the team members |
| The time between sampling and laboratory processing                                     |

bioRxiv preprint doi: <https://doi.org/10.1101/570945>; this version posted March 8, 2019. The copyright holder for this preprint (which was not certified by peer review) is the author/funder, who has granted bioRxiv a license to display the preprint in perpetuity. It is made available under aCC-BY 4.0 International license.

**Table 3.**

| <b>The obstacles during the current phase</b>                                            |
|------------------------------------------------------------------------------------------|
| Arranging home visits to draw samples from the disabled members of the families          |
| The inability of the participants who had school or work commitments during the weekdays |
| The difficulty of arranging all the family members in the same location                  |
| <b>The inability to fast for more than 9 hours</b>                                       |
| The permission to leave school or work                                                   |
| The needle phobia of certain participants                                                |
| The mistrust in diabetes-related research                                                |
| Negative previous experience of healthcare research                                      |

bioRxiv preprint doi: <https://doi.org/10.1101/578945>; this version posted March 9, 2019. The copyright holder for this preprint (which was not certified by peer review) is the author/funder, who has granted bioRxiv a license to display the preprint in perpetuity. It is made available under aCC-BY 4.0 International license.

bioRxiv preprint doi: <https://doi.org/10.1101/570945>; this version posted March 8, 2019. The copyright holder for this preprint (which was not certified by peer review) is the author/funder, who has granted bioRxiv a license to display the preprint in perpetuity. It is made available under aCC-BY 4.0 International license.
